# Supplementary figures and images for: Yth m6A RNA-Binding Protein 1 Regulates Osteogenesis of MC3T3-E1 Cells under Hypoxia via Translational Control of Thrombospondin-1
Source: MDPI journal article supplement (doi:10.3390/ijms24021741), 2023-01-16

**Normoxia**

**NC-oe**

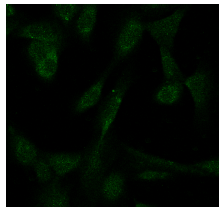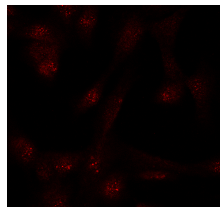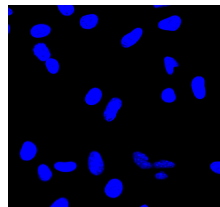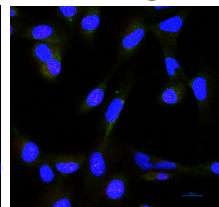

**Ythdf1-oe**

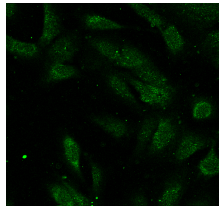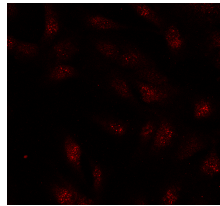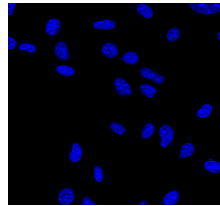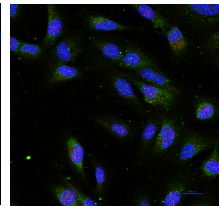

**Hypoxia**

**NC-oe**

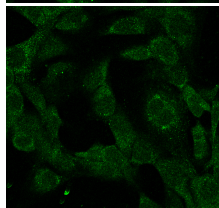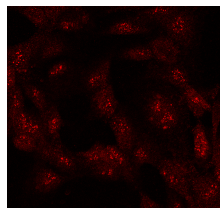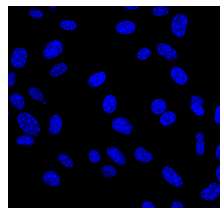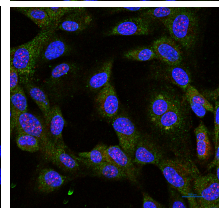

**Ythdf1-oe**

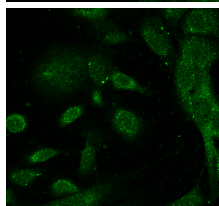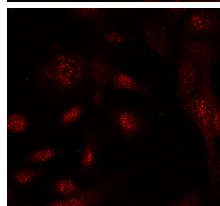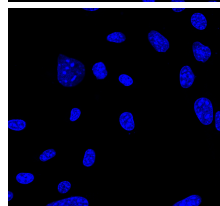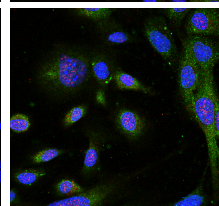

Supplement: s1 [file s1]
